# Supplementary material
Source: PubMed Central journal article supplement (PMC5645203)
Supplement: NIHMS889883-supplement-Supp.pdf [file NIHMS889883-supplement-Supp.pdf]

**Supp. Figure S1.** Eigenvectors of the 23 genomes of PGP 2015 from an analysis of ancestry.

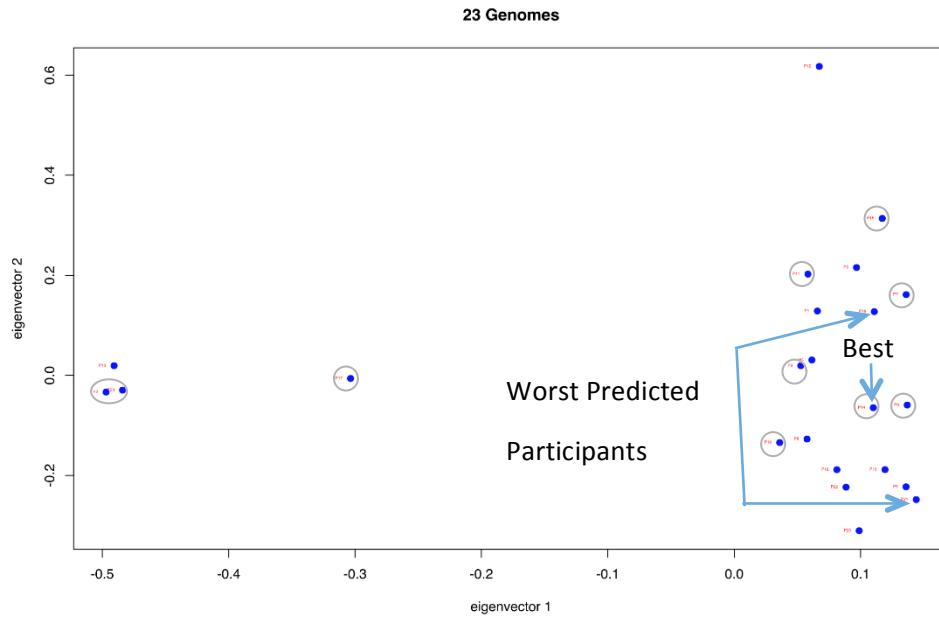

**Supp. Figure S2.** Toy example of Group1's predictive model. The causes of a phenotype  $P[i]$  are variants  $V^C[j]$  (hidden causal variants underlying GWAS hits  $V^W[q]$ ) and variants  $V^A[1]$  (variants with database annotations associated with phenotype  $P[i]$ ). The association between variant a  $V^C[j]$  or  $V^A[1]$  and a phenotype  $P[i]$  is represented by a directed edge, with an associated weight (penetrance)  $\lambda^C[ij]$  or  $\lambda^A[i1]$ .  $\lambda^C[ij]$  is computed by averaging the penetrances of the  $V^W[q]$ .

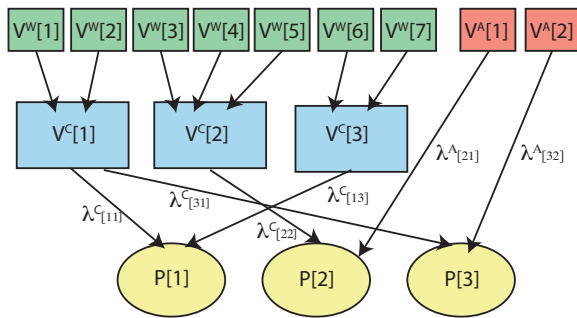

**Supp. Figure S3.** Bayesian network for predicting a phenotype. Red nodes represent an individual's genotype at a segregating site. Green nodes represent genes. Circular blue nodes represent unknown mechanisms that determine the penetrance of affected variants and genes on a phenotype. Red nodes are observed in sequencing data. Green nodes are computational predictions ("estimated data"). Blue nodes are random variables.

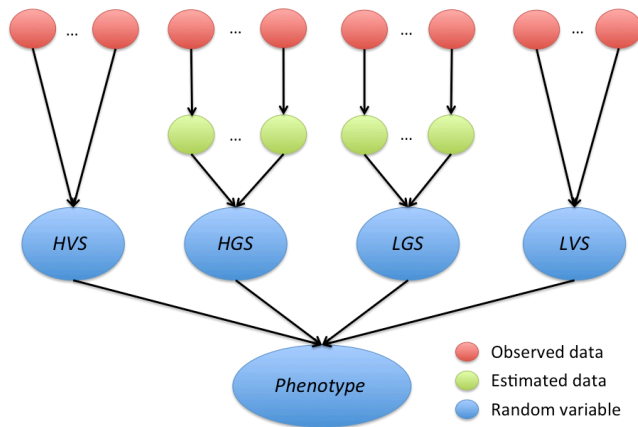

**Supp. Figure S4.** Participant count comparison of blood types between 101 profiles and 23 true profiles of PGP 2015.

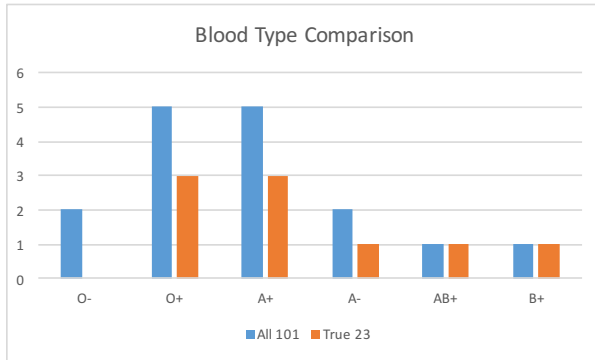

**Supp. Figure S5.** Participant count comparison of eye color between 101 profiles and 23 true profiles of PGP 2015.

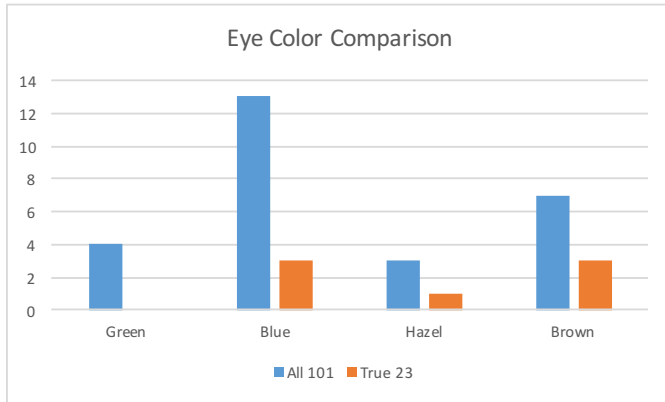

**Supp. Table S1.** Participant profile information ranked by submissions of PGP 2015.

| <b>Rank</b> | <b>Profile</b> | <b>Blood type</b> | <b>Left eye</b> | <b>Maternal grandmother</b> | <b>Paternal grandmother</b> | <b>Paternal grandfather</b> | <b>Maternal grandfather</b> | <b>Age</b> | <b>Gender</b> | <b>Race</b>      |
|-------------|----------------|-------------------|-----------------|-----------------------------|-----------------------------|-----------------------------|-----------------------------|------------|---------------|------------------|
| 1           | 14             | AB +              | light brown     | Italy                       | Russian Federation          | Poland                      | Italy                       | 50-59      | Female        | White            |
| 2           | 12             | N/A               | N/A             | Netherlands                 | US                          | US                          | Netherlands                 | 1992       | Male          | White            |
| 3           | 13             | N/A               | N/A             | China                       | China                       | China                       | China                       | 1975       | Male          | Asian            |
| 4           | 5              | A +               | Blue            | US                          | US                          | Ireland                     | US                          | 1948       | Male          | White            |
| 5           | 6              | N/A               | N/A             | UK                          | Germany                     | Ireland                     | UK                          | 30-39      | Male          | White            |
| 6           | 11             | A +               | aqua            | US                          | US                          | US                          | US                          | 1991       | Neutrois      | White            |
| 7           | 15             | O +               | brown           | US                          | US                          | US                          | US                          | 30-39      | Female        | White            |
| 8           | 7              | B +               | hazel           | US                          | Other                       | Germany                     | US                          | 1947       | Female        | White            |
| 9           | 9              | A +               | blue            | Germany                     | Germany                     | Germany                     | Germany                     | 40-49      | Male          | White            |
| 10          | 23             | N/A               | N/A             | Viet Nam                    | Viet Nam                    | Viet Nam                    | Viet Nam                    | 1982       | Male          | Asian            |
| 11          | 17             | N/A               | N/A             | Peru                        | Peru                        | Peru                        | Peru                        | 1989       | Male          | Hispanic /Latino |
| 12          | 3              | O +               | N/A             | US                          | US                          | US                          | US                          | 40-49      | Male          | White            |
| 13          | 4              | N/A               | N/A             | Canada                      | US                          | US                          | US                          | 1983       | Male          | White            |
| 14          | 8              | N/A               | N/A             | US                          | Turkey                      | Turkey                      | US                          | 1967       | Male          | White            |
| 15          | 18             | N/A               | N/A             | US                          | France                      | France                      | US                          | 1974       | Female        | White            |
| 16          | 22             | N/A               | N/A             | US                          | US                          | Canada                      | US                          | 21-29      | Male          | White            |
| 17          | 20             | N/A               | N/A             | US                          | US                          | US                          | US                          | 21-        | Male          | White            |

|    |    |     |            |       |             |             |        |       |      |                                      |
|----|----|-----|------------|-------|-------------|-------------|--------|-------|------|--------------------------------------|
|    |    |     |            |       |             |             |        | 29    |      |                                      |
| 18 | 1  | N/A | N/A        | US    | US          | Canada      | US     | 21-29 | Male | White                                |
| 19 | 19 | N/A | N/A        | US    | US          | US          | US     | 1951  | Male | White                                |
| 20 | 2  | N/A | N/A        | China | China       | China       | China  | 1988  | Male | Asian                                |
| 21 | 10 | O + | dark brown | US    | Puerto Rico | Puerto Rico | US     | 1988  | Male | Hispanic or Latino, White            |
| 22 | 21 | N/A | N/A        | US    | US          | Other       | Other  | 1981  | Male | American Indian/Alaska Native, White |
| 23 | 16 | A - | blue       | US    | Denmark     | Denmark     | Canada | 50-59 | Male | American Indian/Alaska Native, White |

**Supp. Table S2.** The phenotypes that were chosen by the Group5's submission in PGP 2015.

| <b>k</b> | <b>Phenotype</b>                | <b>Prediction Method</b>                          | <b>SNPs Used</b>                    | <b>Covariates</b> |
|----------|---------------------------------|---------------------------------------------------|-------------------------------------|-------------------|
| <b>1</b> | sex                             | ad hoc                                            | presence of any SNP on chr Y        |                   |
| <b>2</b> | Baldness                        | logistic regression                               | rs2497938                           | sex, age          |
| <b>3</b> | Astigmatism                     | logistic regression                               | rs10496034, rs1658442,<br>rs7534824 | age               |
| <b>4</b> | osteoarthritis                  | logistic regression                               | rs1417066, rs3757837                | sex, age          |
| <b>5</b> | blood type rh<br>blood type ABO | logistic regression<br>conditional<br>multinomial | rs590787<br>rs8176719, rs8176747    |                   |
| <b>6</b> | eye color blue                  | logistic regression                               | rs12913832                          |                   |
| <b>7</b> | Floaters                        | 6 nearest neighbors                               | random 1000 SNPs not on chr<br>Y    |                   |
| <b>8</b> | high triglycerides              | 6 nearest neighbors                               | random 1000 SNPs not on chr<br>Y    |                   |
| <b>9</b> | Gingivitis                      | 6 nearest neighbors                               | random 1000 SNPs not on chr<br>Y    |                   |
